# Supplementary material for: The significance of peroxisome function in chronological aging of Saccharomyces cerevisiae
Source: PubMed Central journal article supplement (PMC3824234; doi:10.1111/acel.12113), 2013-07-08
Supplement: acel0012-0784-SD1.pdf [file acel0012-0784-SD1.pdf]

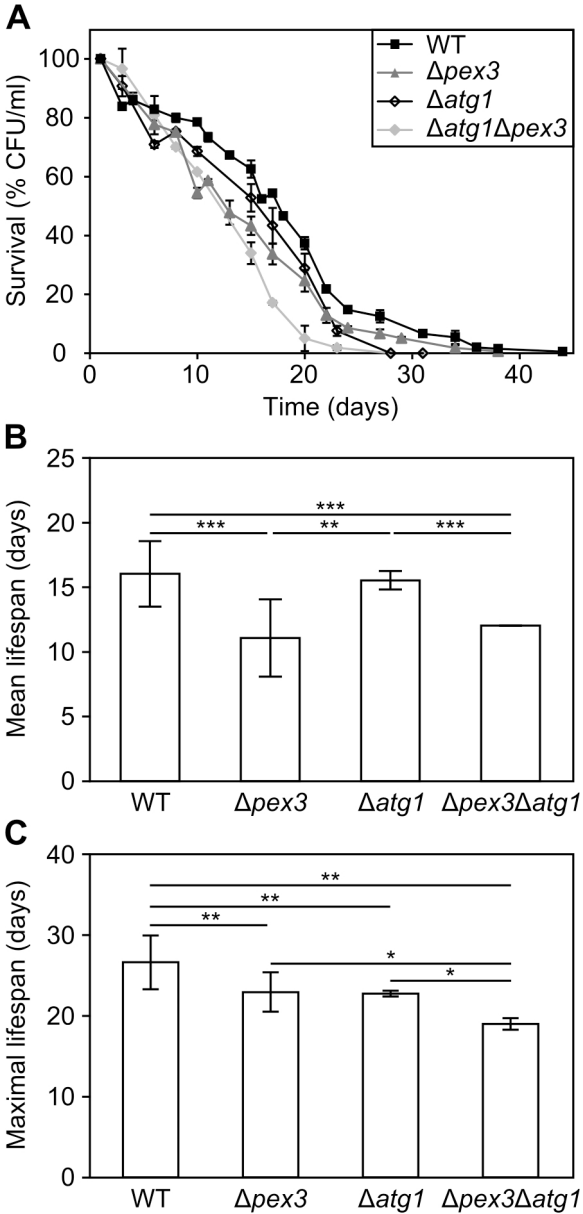

Figure S1
